# Supplementary material for: Development and Characterization of a Humanized Anti-HER2 Antibody HuA21 with Potent Anti-Tumor Properties in Breast Cancer Cells
Source: MDPI journal article supplement (doi:10.3390/ijms17040563), 2016-04-15
Supplement: s1 [file s1]

# Supplementary Materials: Development and Characterization of a Humanized Anti-HER2 Antibody HuA21 with Potent Anti-Tumour Properties in Breast Cancer Cells

Ruilin Li, Siyi Hu, Yan Chang, Zhihui Zhang, Zhao Zha, Hui Huang, Guodong Shen, Jing Liu, Lihua Song and Wei Wei

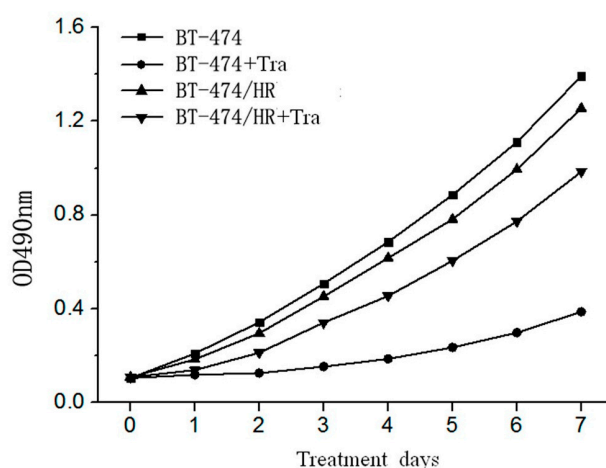

**Figure S1.** The effects of trastuzumab (Tra) on proliferation of BT-474 and BT-474/HR cells *in vitro*. The BT-474 and BT-474/HR cells was incubated with or without trastuzumab (10  $\mu$ g/mL) for indicated periods, the proliferation was measured by a CCK-8 proliferation kit.

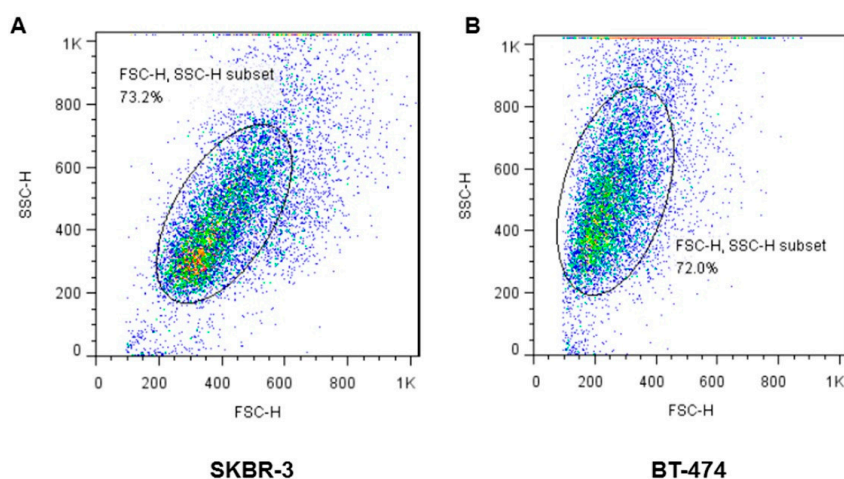

**Figure S2.** The gates were used for the flow cytometric analysis for the two tumour cells. (A) The gate was used for the flow cytometric analysis for the SKBR3 cells; (B) The gate was used for the flow cytometric analysis for the BT-474 cells. The blue marked cells mean uninternalized antibody cells, while the other colored cells represent FITC-conjugated HuA21.
